# Supplementary material for: Achieving full-color emission in coal-based humic acid derived carbon dots through intradot aggregation
Source: Royal Society of Chemistry journal article supplement (doi:10.1039/d1tc05679d), 2022-01-01
Supplement: d1tc05679d1.pdf [file d1tc05679d1.pdf]

## Supplementary data

### Achieving full-color emission in coal-based humic acid derived carbon dots through intradot aggregation

Shanchao Song, Zhicai Wang\*, Zhanku Li, Jingchong Yan, Chunxiu Pan, Shigang Kang, Zhiping Lei, Shibiao Ren and Hengfu Shui

*School of Chemistry and Chemical Engineering, Anhui Key laboratory of Clean Coal Conversion & Utilization,*

*Anhui University of Technology, 243002 Ma'anshan, China*

**Table S1.** The synthesis of CPDs using different solvent and gas atmosphere.

| Conditions       | DMF            |                | H <sub>2</sub> O |                | C <sub>2</sub> H <sub>5</sub> OH |                |
|------------------|----------------|----------------|------------------|----------------|----------------------------------|----------------|
|                  | O <sub>2</sub> | N <sub>2</sub> | O <sub>2</sub>   | N <sub>2</sub> | O <sub>2</sub>                   | N <sub>2</sub> |
| Residue mass /mg | 0              | 0              | 17               | 19             | 15                               | 18             |
| QY /%            | 8.9            | 5.9            | 6.7              | 4.3            | 9.1                              | 6.0            |

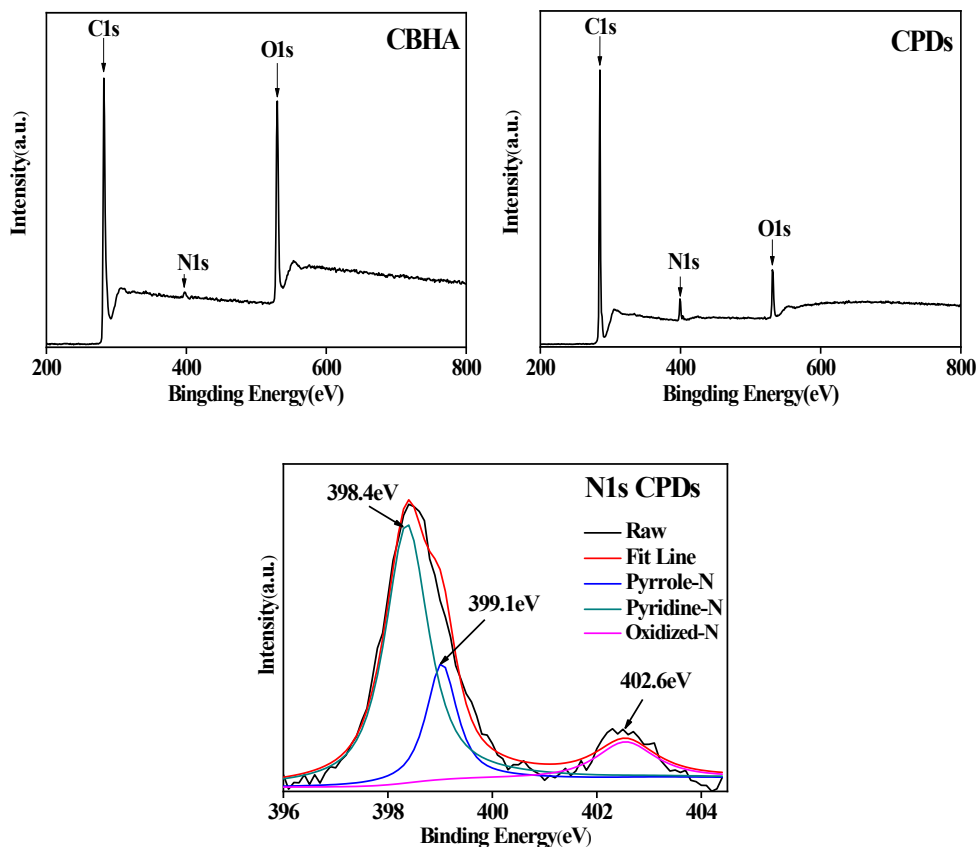

**Figure S1.** XPS survey spectra of CBHA and CPDs, and N1s spectrum of CPDs.

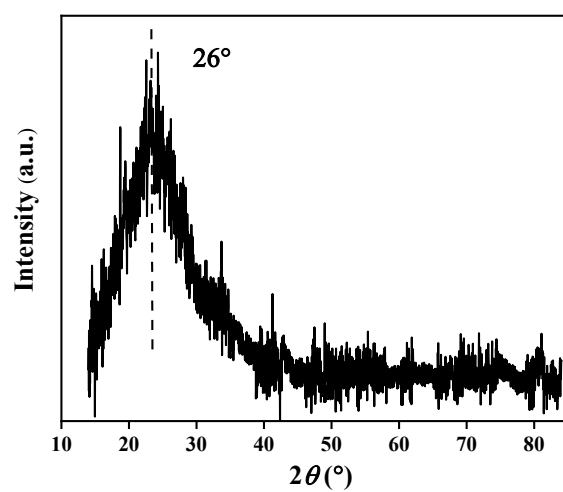

**Figure S2.** XRD pattern for the obtained CPDs

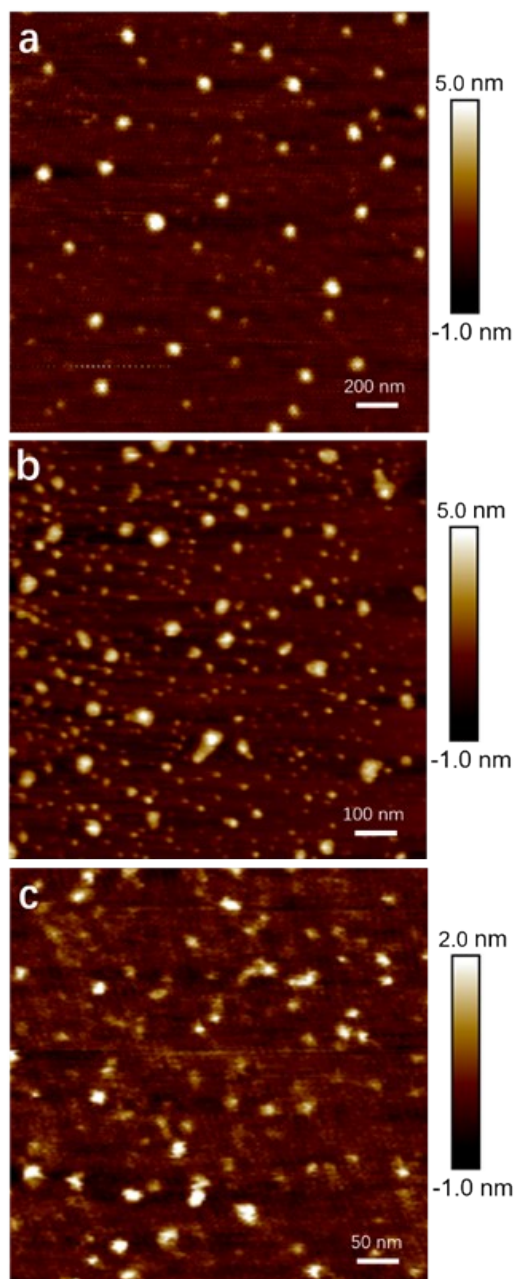

**Figure S3.** AFM images of CPDs obtained at different concentrations: (a) 2.5 mg/mL, (b) 1.25 mg/mL, (c) 0.625 mg/mL.

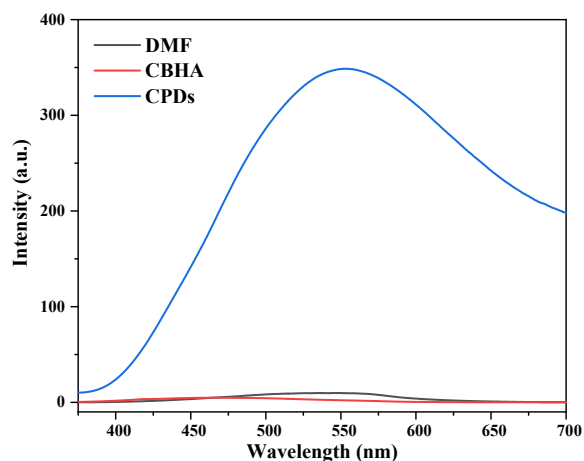

**Figure S4.** Fluorescence spectra of DMF, CBHA and CPDs solution (1.5 mg/ML).

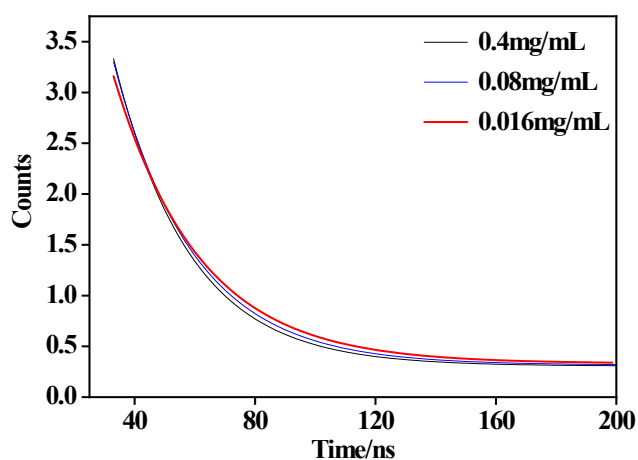

**Figure S5.** Fluorescence decay curves of the CPDs at different concentrations.

**Table S2.** The lifetime fitting of the CPDs.†

| Concentration mg/mL | $\tau_1$ /ns | $\tau_2$ /ns | $\tau_3$ /ns | $\tau_{\text{average}}$ /ns | P <sub>1</sub> /% | P <sub>2</sub> /% | P <sub>3</sub> /% |
|---------------------|--------------|--------------|--------------|-----------------------------|-------------------|-------------------|-------------------|
| 0.4                 | 1.06         | 3.9          | 11.04        | 5.49                        | 19.78             | 50.15             | 30.09             |
| 0.08                | 0.78         | 3.91         | 12.03        | 5.77                        | 15.01             | 56.31             | 28.68             |
| 0.016               | 0.84         | 4.02         | 12.45        | 6.13                        | 14.91             | 54.41             | 30.68             |

† Excitation: 340 nm, Emission: 460 nm.
